# Supplementary material
Source: PubMed Central journal article supplement (PMC4261152)

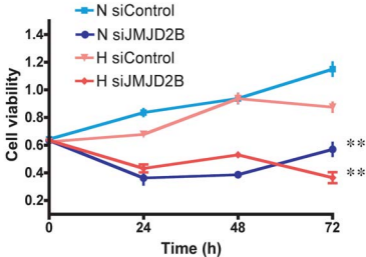

Supplement: NIHMS31248-supplement-2.pdf [file NIHMS31248-supplement-2.pdf]
